# Supplementary material
Source: Elsevier journal article supplement (https://www.sciencedirect.com/science/article/pii/S2444845116300283)
Supplement: mmc1 [file S2444845116300283:mmc1.docx]

# Annex 1

# *List of articles JCR GEM/gender*

| **Nº** | **Article** | **Authors** | **Citations rec.** | **Journal** | **Year** | **Vol.** | **Nº** |
| --- | --- | --- | --- | --- | --- | --- | --- |
| 1 | The Entrepreneurial  Propensity of Women | Langowitz, N.; Minniti, M. | 100 | Entrepreneurship Theory and Practice | 2007 | 31 | 3 |
| 2 | Explaining female and male entrepreneurship at the country level | Verheul, I.; van Stel, A.; Thurik, R. | 69 | Entrepreneurship and Regional Development | 2006 | 18 | 2 |
| 3 | Being in Someone Else’s Shoes: the Role  of Gender in Nascent Entrepreneurship | Minniti, M.; Nardone, C. | 56 | Small Business Economics | 2007 | 28 | 2-3 |
| 4 | The normative context for women's participation in entrepreneruship: A multicountry study | Baughn, C.; Chua, B. L.; Neupert, K.E. | 50 | Entrepreneurship: Theory and Practice | 2006 | 30 | 5 |
| 5 | Perceived financial barriers and the start-up decision an econometric analysis of gender differences using GEM data | Roper, S.; Scott, J.M. | 24 | International Small Business Journal | 2009 | 27 | 2 |
| 6 | Informal investment in transition economies: Individual characteristics and clusters | Szerb, L.; Rappai, G.; Makra, Z.; Terjesen, S. | 16 | Small Business Economics | 2007 | 28 | 2-3 |
| 7 | Gender Differences in Entrepreneurial Propensity | Koellinger, P.; Minniti, M.; Schade, C. | 9 | Oxford Bulletin of Economics and Statistics | 2013 | 75 | 2 |
| 8 | Reasons for the relatively lower entrepreneurial activity levels of rural women in Spain | Driga, O.; Lafuente, E.; Vaillant, Y. | 7 | Sociología Ruralis | 2009 | 49 | 1 |
| 9 | Female entrepreneurship in Latin America and the Caribbean: Characteristics, drivers and relationship to economic development | Terjesen, S.; Amorós, J.E. | 5 | European Journal of Development Research | 2010 | 22 | 3 |
| 10 | Gendered institutions and cross-national patterns of business creation for men and women | Elam, A.; Terjesen, S. | 5 | European Journal of Development Research | 2010 | 22 | 3 |
| 11 | Women and home-based entrepreneurship evidence from the United Kingdom | Thompson, P.; Jones-Evans, D.; Kwong, C. | 5 | International Small Business Journal | 2009 | 27 | 2 |
| 12 | Determinants of hotels and restaurants entrepreneurship: A study using GEM data | Ramos-Rodríguez, A.; Medina-Garrido, J.; Ruiz-Navarro, J. | 3 | International Journal of Hospitality Management | 2012 | 31 | 2 |
| 13 | Entrepreneurial exit and entrepreneurial engagement | Hessels, J.; Grilo, I.; Thurik, R.; van der Zwan, P. | 3 | Journal of Evolutionary Economics | 2011 | 21 | 3 |
| 14 | Dice thrown from the beginning? An empirical investigation of determinants of firm level growth expectations | Terjesen, S.; Szerb, L. | 2 | Estudios de Economía | 2008 | 35 | 2 |
| 15 | Discovery of entrepreneurial opportunities: a gender perspective | González-Álvarez, N.; Solís-Rodríguez, V. | 2 | Industrial Management & Data Systems | 2011 | 111 | 5-6 |
| 16 | Institutions and female entrepreneurship | Estrin, S.; Mickiewicz, T. | 2 | Small Business Economics | 2011 | 37 | 4 |
| 17 | The scarcity of female entrepreneurship | Tominc, P.; Rebernik, M. | 2 | Drustvena Istrazivanja | 2004 | 13 | 4-5 |
| 18 | Variation in the level of activity across the stages of the entrepreneurial startup process-evidence from 35 countries | Arenius, P.; Ehrstedt, S. | 2 | Estudios de Economía | 2008 | 35 | 2 |
| 19 | Political Empowerment, Rule of Law, and Women's Entry into Entrepreneurship | Goltz, S.; Buche, M.W.; Pathak, S. | 1 | Journal Of Small Business Management | 2014 | 42 | 3 |
| 20 | Strategic Capabilities and Performance in Women-Owned Businesses in Mexico | Rodriguez, P.; Fuentes, M.M.; Rodriguez, L. | 1 | Journal Of Small Business Management | 2014 | 52 | 3 |
| 21 | What determines the level of informal venture finance investment? Market clearing forces and gender effects | Burke, A.; van Stel, A.; Hartog, C.; Ichou, A. | 1 | Small Business Economics | 2014 | 42 | 3 |
| 22 | An Initial Review of the Characteristics and Determinants of Female Entrepreneurs in Puerto Rico | Santiago-Castro, M.; Pisani, M.J. | 0 | AD-minister | 2013 |  | 23 |
| 23 | Assessing entrepreneurship perceptions of high school learners in Pietermaritzburg, Kwazulu-Natal | Mahadea, D.; Ramroop, S.; Zewotir, T. | 0 | South African Journal of Economic and Management Sciences | 2011 | 14 | 1 |
| 24 | Assessing the determinants of entrepreneurial consolidation: empirical evidence from GEM countries | Álvarez-Herranz, A.; Valencia-de Lara, P.; Martínez-Ruiz, M.P. | 0 | Actual Problems of Economics | 2011 |  | 124 |
| 25 | Assessing the main determinants of entrepreneurship in Portugal. Análise dos principais determinantes do empreendedorismo em Portugal | Figueiredo, V.; Oliveira, A. | 0 | Tourism & Management Studies | 2015 | 11 | 1 |
| 26 | Cultural diversity and entrepreneurial activity | Álvarez, C.; Urbano, D. | 0 | Revista de Ciencias Sociales | 2013 | 19 | 1 |
| 27 | Entrepreneurial motivation as a determinant of South American firm consolidation | Álvarez-Herranz, A.; Valencia-De Lara, P. | 0 | African Journal of Business Management | 2011 | 5 | 17 |
| 28 | Entrepreneurship in Korea: Global Entrepreneurship Monitor (GEM) Korea 2010 | Bahn, S.; Seosanggu; Songgyeongmo; Jodonghwan; Bakjonghae; Minseok, C. | 0 | Journal of the Korean Entrepreneurship Socieity | 2011 | 6 | 2 |
| 29 | Entrepreneurship in Korea: Global Entrepreneurship Monitor (GEM) Korea 2008 | Bahn, S.; Kelley, D.; Lee, Y.; Yihyeonsuk; Seosanggu | 0 | Journal of the Korean Entrepreneurship Socieity | 2009 | 4 | 3 |
| 30 | Entrepreneurship in Korea: An International Comparison based on Global Entrepreneurship Monitor (GEM) 2013 | Bahn, S.; Kyung-mo. Seosanggu; Minseok, C.; cho Min-Sun; Bakjongbok; Bakjonghae | 0 | Journal of the Korean Entrepreneurship Socieity | 2014 | 9 | 4 |
| 31 | Entrepreneurship in Korea: based on Global Entrepreneurship Monitor (GEM) Korea 2012 | Bahn, S.; Canción, K. seosanggu; Jodonghwan; Bakjonghae; Minseok, C.; Bakjongbok | 0 | Journal of the Korean Entrepreneurship Socieity | 2013 | 8 | 3 |
| 32 | Entrepreneurship in Korea: Global Entrepreneurship Monitor (GEM) Korea 2011 | Bahn, S.; Seosanggu; Songgyeongmo; Jodonghwan; Bakjonghae; Minseok, C. | 0 | Journal of the Korean Entrepreneurship Socieity | 2012 | 7 | 3 |
| 33 | Entrepreneurship in Korea: Global Entrepreneurship Monitor (GEM) Korea 2009 | Banseongsik; Songgyeongmo; Minseok, C.; Gimsangpyo; Jodonghwan; Bakjonghae | 0 | Journal of the Korean Entrepreneurship Socieity | 2010 | 5 | 3 |
| 34 | Entrepreneurship in regions: differentiated impacts of the socio cultural and gender types | Mancilla, C.; Amorós, J.E | 0 | Academia-Revista Latinoamericana De Administracion | 2015 | 28 | 1 |
| 35 | Factors determining the appearance of‘born global' companies: analysis of early internationalisation for SMEs in Colombia. Factores que condicionan la aparicion de las born global: analisis de la internacionalizacion temprana de las PYMES en Colombia | Escandón, D.M.; González-Campo, C.H.; Murillo, G. | 0 | Pensamiento & Gestión | 2013 |  | 35 |
| 36 | Gender analysis of entrepreneurial intentions as a function of economic development across three groups of countries | Sánchez-Escobedo, M.C.; Díaz-Casero, J.C.; Díaz-Aunión, M.A.; Hernández-Mogollón, R. | 0 | International Entrepreneurship And Management Journal | 2014 | 10 | 4 |
| 37 | Informal investors in Chile: an exploratory study from a gender perspective | Romaní, G.; Atienza, M.; Amorós, J.E. | 0 | Journal of Business Economics and Management | 2012 | 13 | 1 |
| 38 | Socio-cultural factors and female entrepreneurship | Noguera, M.; Álvarez, C.; Urbano, D. | 0 | International Entrepreneurship and Management Journal | 2013 | 9 | 2 |
| 39 | The attitude toward the risk of entrepreneurial activity: evidence from Chile | Sepúlveda, J.P.; Bonilla, C.A. | 0 | Academia-Revista Latinoamericana de Administracion | 2011 |  | 46 |
| 40 | The Woman Entrepreneur in Albania: An Exploratory Study on Motivation, Problems and Success Factors | Ramadani, V. | 0 | Journal Of Balkan And Near Eastern Studies | 2015 | 17 | 2 |
